# Supplementary material for: Combining environmental and socioeconomic data to understand determinants of conflicts in Colombia
Source: Frontiers journal article supplement (doi:10.3389/fdata.2023.1107785), 2023-02-16
Supplement: Presentation_1.PDF [file Presentation_1.PDF]

## Supplementary Material

### 1 GENERAL STATISTICS ON CONFLICT DATA

In this study, we focus on conflicts event in Colombia and we rely on an event-based dataset that includes nearly 3000 events over 400 colombian municipalities. We perform the spatial analysis at municipalities level (admin2 administrative unit) and we visualize the trend of conflicts by department level (admin1 administrative unit) in 2018. Figure S1 shows the number of events that occurred per department after having normalized the number of conflicts of each municipality for the population number. We highlight Norte de Santander, Nariño and Antioquia as the most affected departments. Figure S2 shows the trend of conflicts per each month of the year 2018, comparing all departments. We observe heterogeneity among departments in terms of periods with increased or decreased conflicts. Also, we can find spikes in correspondance to a specific month, as for April 2018 in Norte de Santander.

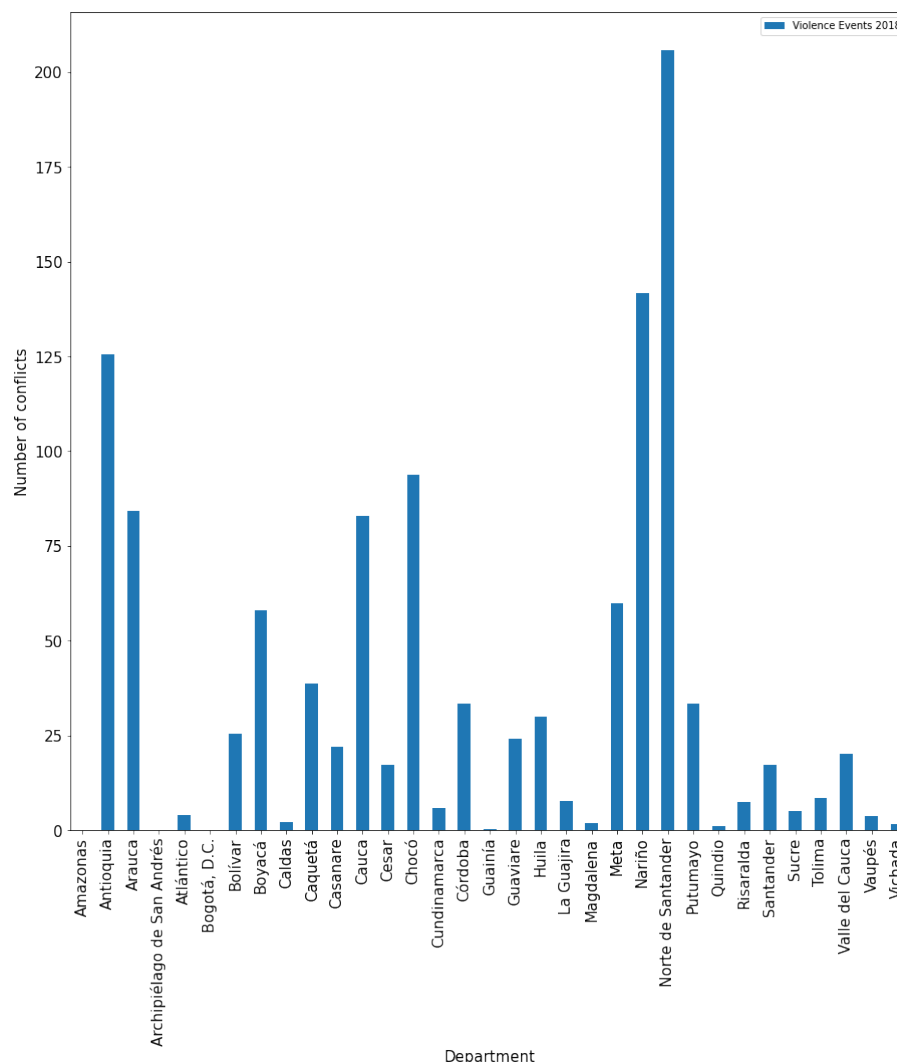

**Figure S1.** Number of events occurred in 2018 per colombian department

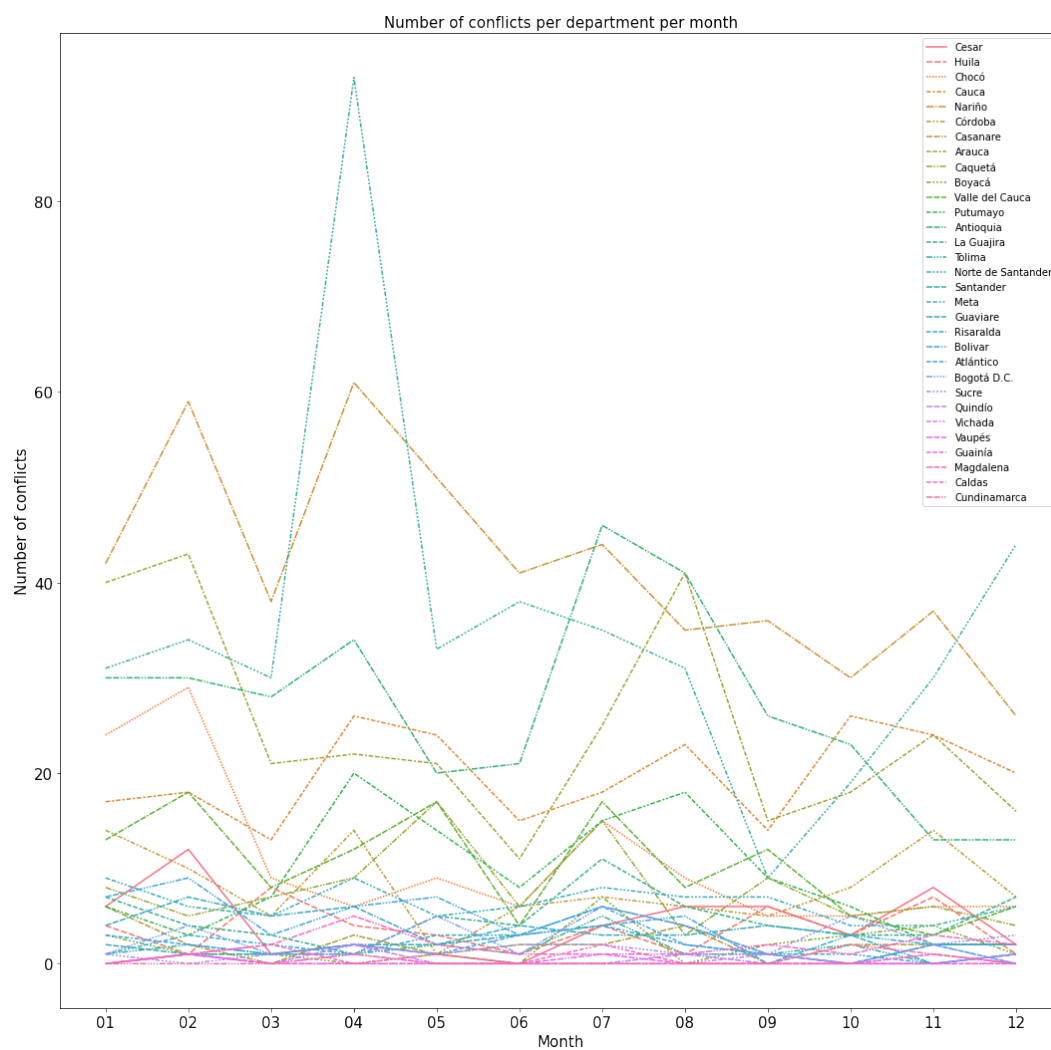

**Figure S2.** Number of events occurred in 2018 per colombian department

## 2 DATA COLLECTION

In this project, we rely on open data. Regarding conflicts and disaster events we make use of the tool provided by the United Nations Office for Coordination of Human Affairs (OCHA) that allows monitoring of the Colombian situation per year and per different admin levels. Regarding social, economic, and specific environmental information, we use data from the Terridata platform, a tool created by the Colombian National Planning Department (DNP). A description of the 53 control variables and of the target variable can be found in Table S1 and Table S2.

| Variable                                    | Type                                   | Source                                                                                                                          |
|---------------------------------------------|----------------------------------------|---------------------------------------------------------------------------------------------------------------------------------|
| <i>Conflicts</i>                            |                                        |                                                                                                                                 |
| Violence events                             | number events<br>per a thousand people | OCHA                                                                                                                            |
| <i>Demography</i>                           |                                        |                                                                                                                                 |
| Indigenous population                       | people                                 | TerriData, with Departamento Administrativo Nacional de Estadística (DANE) data from the National Population and Housing Census |
| Black, mulatto or Afro-Colombian population | people                                 | TerriData, with DANE data                                                                                                       |
| Raizal population                           | people                                 | TerriData, with DANE data                                                                                                       |
| Rom population                              | people                                 | TerriData, with DANE data                                                                                                       |
| Rural population                            | people                                 | TerriData, with DANE data                                                                                                       |
| Urban population                            | people                                 | TerriData, with DANE data                                                                                                       |
| Total ethnic population                     | people                                 | TerriData, with DANE data                                                                                                       |
| Total men                                   | people                                 | DANE                                                                                                                            |
| Total women                                 | people                                 | DANE                                                                                                                            |
| 0-4 years                                   | people                                 | DANE                                                                                                                            |
| 5-9 years                                   | people                                 | DANE                                                                                                                            |
| 10-14 years                                 | people                                 | DANE                                                                                                                            |
| 15-19 years                                 | people                                 | DANE                                                                                                                            |
| 20-24 years                                 | people                                 | DANE                                                                                                                            |
| 25-29 years                                 | people                                 | DANE                                                                                                                            |
| 30-34 years                                 | people                                 | DANE                                                                                                                            |
| 35-39 years                                 | people                                 | DANE                                                                                                                            |
| 40-44 years                                 | people                                 | DANE                                                                                                                            |
| 45-49 years                                 | people                                 | DANE                                                                                                                            |
| 50-54 years                                 | people                                 | DANE                                                                                                                            |
| 55-59 years                                 | people                                 | DANE                                                                                                                            |
| 60-64 years                                 | people                                 | DANE                                                                                                                            |
| 65-69 years                                 | people                                 | DANE                                                                                                                            |
| 70-74 years                                 | people                                 | DANE                                                                                                                            |
| 75-79 years                                 | people                                 | DANE                                                                                                                            |
| 80-84 years                                 | people                                 | DANE                                                                                                                            |
| over 85 years                               | people                                 | DANE                                                                                                                            |
| <i>Education</i>                            |                                        |                                                                                                                                 |
| Gross coverage in basic education           | %                                      | TerriData, with Departamento Administrativo Nacional de Estadística (DANE) data from the 2018 Census                            |
| Net coverage in basic education             | %                                      | TerriData, with DANE data                                                                                                       |
| Illiteracy Rate (Census)                    | %                                      | TerriData, with DANE data                                                                                                       |
| Rural Illiteracy Rate (Census)              | %                                      | TerriData, with DANE data                                                                                                       |
| Urban Illiteracy Rate (Census)              | %                                      | TerriData, with DANE data                                                                                                       |

**Table S1.** Description of explanatory variables and data source - Table 1

| Variable                                  | Type                                   | Source                                                                                              |
|-------------------------------------------|----------------------------------------|-----------------------------------------------------------------------------------------------------|
| <i>Environment</i>                        |                                        |                                                                                                     |
| Disasters Events 2017                     | number events<br>per a thousand people | OCHA                                                                                                |
| Disasters Events 2018                     | number events<br>per a thousand people | OCHA                                                                                                |
| Mass Movement                             | eventos                                | TerriData, with DNP data from<br>Unidad Nacional para la Gestión<br>del Riesgo de Desastres (UNGRD) |
| Floods                                    | eventos                                | TerriData, with DNP data from UNGRD                                                                 |
| Droughts                                  | eventos                                | TerriData, with DNP data from UNGRD                                                                 |
| Earthquakes                               | eventos                                | TerriData, with DNP data from UNGRD                                                                 |
| Forest Fires                              | eventos                                | TerriData, with DNP data from UNGRD                                                                 |
| Cumulative total of disaster events       | eventos                                | TerriData, with DNP data from UNGRD                                                                 |
| Disaster Management                       | thousands of constant pesos            | TerriData, with DNP data from FUT                                                                   |
| Total in disaster management              | thousands of constant pesos            | TerriData, with DNP data from<br>Formulario Único Territorial (FUT)                                 |
| <i>Finance</i>                            |                                        |                                                                                                     |
| Total Expenses                            | millions of current pesos              | TerriData, with DNP data from FUT<br>Formulario Único Territorial                                   |
| Total Income                              | millions of current pesos              | TerriData, with DNP data from FUT                                                                   |
| Total Income Per Capita                   | millions of current pesos              | TerriData, with DNP data from<br>FUT and DANE                                                       |
| Investment - Agriculture                  | millions of current pesos              | TerriData, with data from FUT                                                                       |
| Investment - Environment                  | millions of current pesos              | TerriData, with data from FUT                                                                       |
| Investment - Social Promotion             | millions of current pesos              | TerriData, with data from FUT                                                                       |
| Investment - Culture                      | millions of current pesos              | TerriData, with data from FUT                                                                       |
| Investment - Community Development        | millions of current pesos              | TerriData, with data from FUT                                                                       |
| Investment - Education                    | millions of current pesos              | TerriData, with data from FUT                                                                       |
| Investment - Justice and Security         | millions of current pesos              | TerriData, with data from FUT                                                                       |
| Investment - Disaster prevention and Care | millions of current pesos              | TerriData, with data from FUT                                                                       |
| Investment - Health                       | millions of current pesos              | TerriData, with data from FUT                                                                       |
| Investment - Transportation               | millions of current pesos              | TerriData, with data from FUT                                                                       |
| Education                                 | %                                      | TerriData, with DNP data from FUT<br>and Departamento Nacional de<br>Planeación (SICODIS)           |
| Health                                    | %                                      | TerriData, with DNP data<br>from FUT and SICODIS                                                    |
| <i>Economy</i>                            |                                        |                                                                                                     |
| Value added by economic activities        | billions of current pesos              | TerriData, with DNP data from DANE                                                                  |
| Primary activities                        |                                        |                                                                                                     |
| Value added by economic activities        | billions of current pesos              | TerriData, with DNP data from DANE                                                                  |
| Secondary activities                      |                                        |                                                                                                     |
| <i>Access to public services</i>          |                                        |                                                                                                     |
| Electric Power Coverage (Census)          | %                                      | TerriData, with DANE data                                                                           |
| Natural Gas Coverage (Census)             | %                                      | TerriData, with DANE data                                                                           |
| Internet Coverage (Census)                | %                                      | TerriData, with DANE data                                                                           |
| Aqueduct Coverage (Census)                | %                                      | TerriData, with DANE data                                                                           |
| Sewer Coverage (Census)                   | %                                      | TerriData, with DANE data                                                                           |
| Qualitative Housing Deficit (Census)      | %                                      | TerriData, with DANE data                                                                           |
| Quantitative Housing Deficit (Census)     | %                                      | TerriData, with DANE data                                                                           |

Table S2. Description of explanatory variables and data source - Table 2

| Variable                                | Type                         | Source                                                                    |
|-----------------------------------------|------------------------------|---------------------------------------------------------------------------|
| <i>Health</i>                           |                              |                                                                           |
| Mortality Rate                          | cases for 1000 inhabitants   | TerriData, with Ministry of Health and Social Protection data (MSPS)      |
| HIV Incidence                           | cases for 100000 inhabitants | TerriData, with MSPS data                                                 |
| Poor unserved population                | people                       | TerriData, with MSPS data                                                 |
| <i>Job Market</i>                       |                              |                                                                           |
| Percentage of formally employed persons | %                            | TerriData, with DNP data from FILCO - Ministry of Labour                  |
| Companies Generating Formal Employment  | number of companies          | TerriData with DNP data from FILCO                                        |
| <i>Territorial Planning</i>             |                              |                                                                           |
| Indigenous reservation                  | hectares                     | TerriData, with DNP data from Instituto Geográfico Agustín Codazzi (IGAC) |
| Cocaine Cultivation Areas               | % per municipality           | GOVCO portal                                                              |
| Coffee Areas - Sown Areas               | hectares                     | GOVCO portal                                                              |
| Coffee Areas - Harvested Areas          | hectares                     | GOVCO portal                                                              |
| Coffee Production                       | tons                         | GOVCO portal                                                              |
| Coffee Yield                            | tons/hectares                | GOVCO portal                                                              |

**Table S3.** Description of explanatory variables and data source - Table 3

### 3 ANALYSIS OF DETERMINANTS

#### 3.1 Multicollinearity Analysis

The first step of filtering is focused on avoiding redundancy. We check for multicollinearity and thus if we observe variables with a correlation coefficient among each other higher than 0.8, we drop out from the set of features the one that shows a weaker relationship with the target. After this processing, we filter out the features shown in Table S4.

| Variables                                                      |
|----------------------------------------------------------------|
| Cumulative total of disaster events                            |
| Education                                                      |
| Gross Coverage in Basic Education                              |
| Health                                                         |
| Illiteracy Rate (Census)                                       |
| Investment - Attention to vulnerable groups - social promotion |
| Investment - Community Development indigenous reservations     |
| Investment - Culture                                           |
| Investment - Education                                         |
| Investment - Health                                            |
| Investment - Justice and security                              |
| Investment - Prevention and attention to disasters             |
| Investment - Transportation                                    |
| Rom population                                                 |
| Total ethnic population                                        |
| Total expenses                                                 |
| Total in disaster management                                   |
| Total income                                                   |
| Total men                                                      |
| Total women                                                    |
| 0-4 years                                                      |
| 5-9 years                                                      |
| 10-14 years                                                    |
| 15-19 years                                                    |
| 20-24 years                                                    |
| 25-29 years                                                    |
| 30-34 years                                                    |
| 35-39 years                                                    |
| 40-44 years                                                    |
| 45-49 years                                                    |
| 50-54 years                                                    |
| 55-59 years                                                    |
| 60-64 years                                                    |
| 65-69 years                                                    |
| 70-74 years                                                    |
| 75-79 years                                                    |
| 80-84 years                                                    |
| Coffee Areas - Sawn Areas                                      |
| Unattended poor population - PPNA                              |
| Urban population                                               |
| Value added by economic activities - Secondary activities      |

**Table S4.** Explanatory variables filtered out after the first *feature selection* step

### 3.2 Feature Selection

Then, we implement the Forward Stepwise selection strategy to reduce model complexity. We take into account the stability of random perturbations of training samples by randomly subsampling for 300 times the 63.2% of the initial dataset and running the selection procedure on the subset, considering the Akaike's Information Criteria (AIC) minimum value. We select features that occur at least in 150 tests. Figure S3 shows the results, Table S5 reports the final subset of features selected and Figure S4 shows variables distribution.

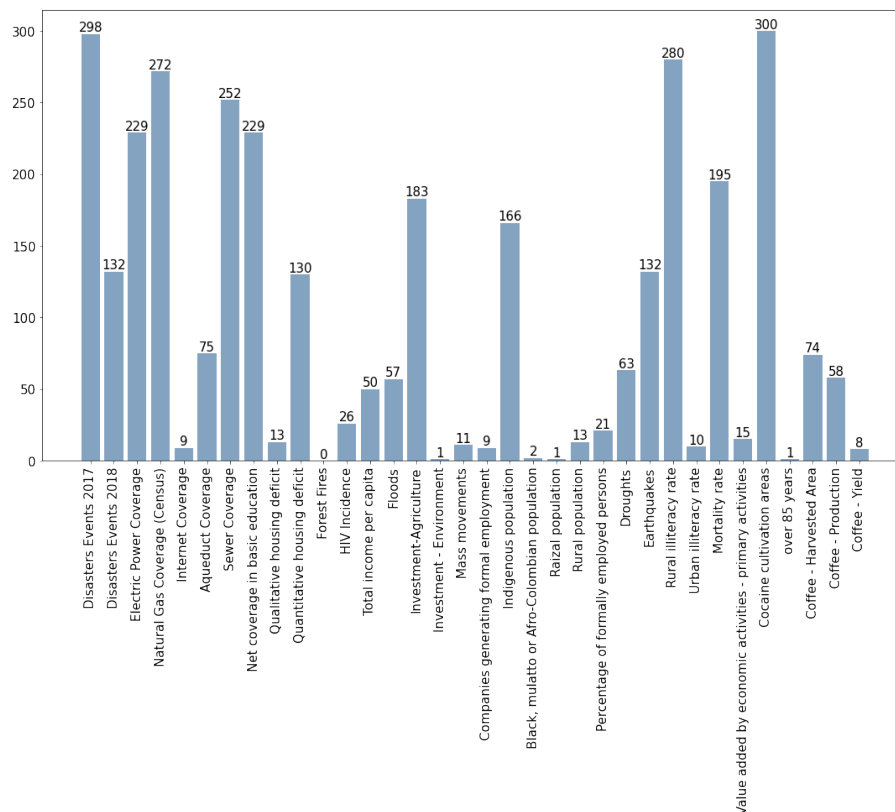

**Figure S3.** Occurrence of each variable in the analysis of determinants

| Variables                       |
|---------------------------------|
| Cocaine Cultivation Areas       |
| Disasters Events 2017           |
| Electric Power Coverage         |
| Indigenous Population           |
| Investment - Agriculture        |
| Mortality Rate                  |
| Natural Gas Coverage            |
| Net Coverage in Basic Education |
| Rural Illiteracy Rate           |
| Sewerage coverage               |

**Table S5.** Explanatory variables considered after *feature selection* step

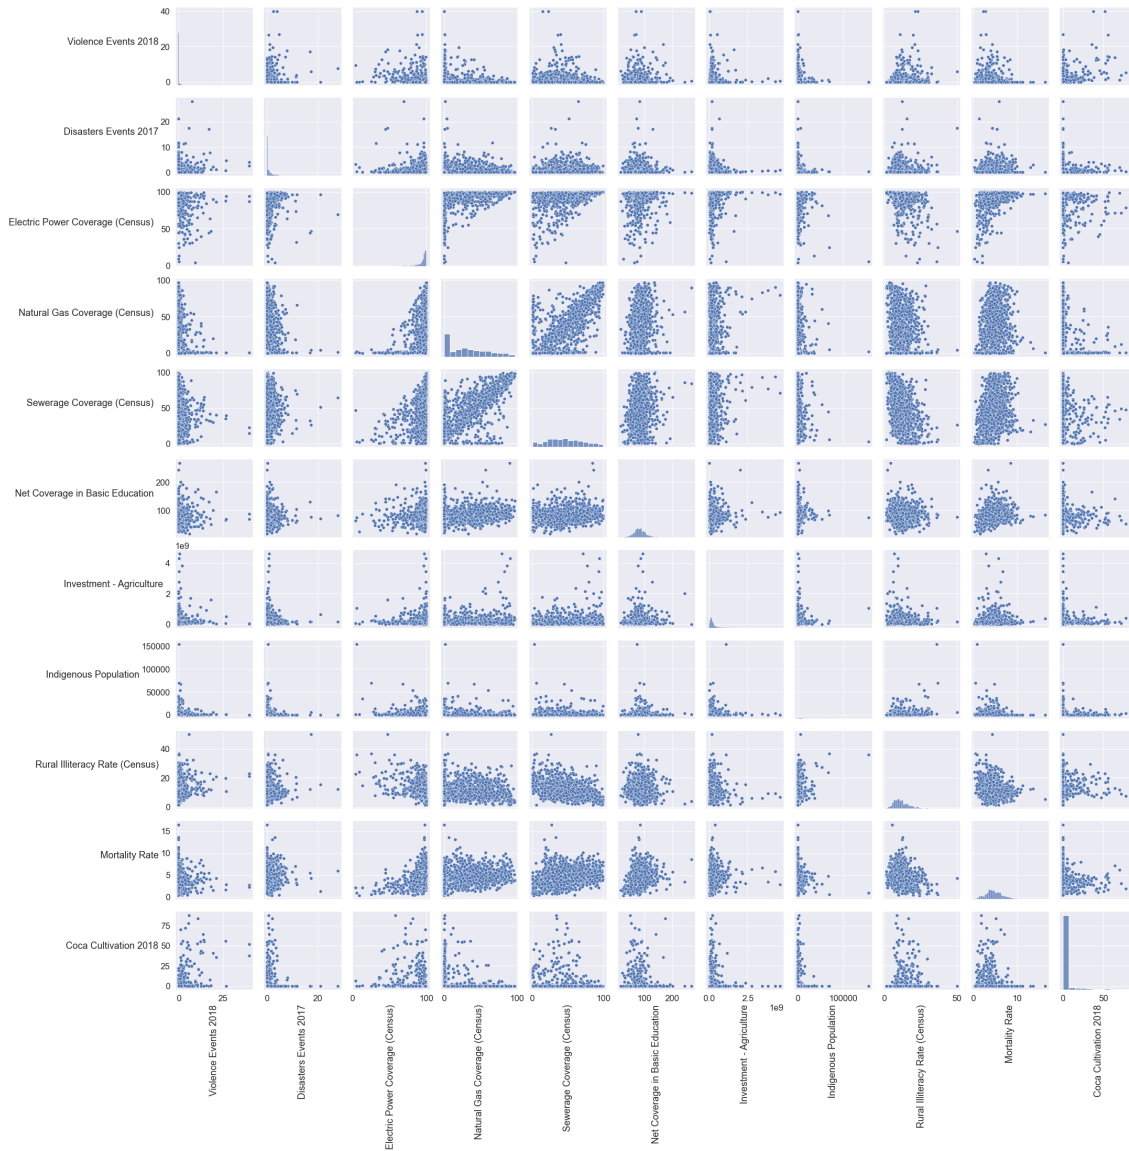

**Figure S4.** Distribution of selected variables

We have also analyzed the outcome of two additional feature selection approaches on the variables final set: VIF (variance inflation factor) method and Random Forest method based on Gini.

With respect to the VIF method, as already done for the first approach, we reduce the number of features from 75 to nearly 40 by looking at multicollinearity through the Pearson correlation coefficient. Then, we compute the VIF factor: the results are reported in Table: S6. A rule of thumb is that if  $VIF > 10$ , then multicollinearity is high. For this reason, we repeatedly remove all the features with VIF factor higher than 10. The Table shows the final set of covariates.

As regards the Random Forest method based on Gini, we select the most important fifteen features as final set of covariates: Figure S5 shows the feature importance.

In the section 5 we discuss about the two different feature selection approaches that eventually produce similar results.



| Feature                             | VIF     | Feature                                      | VIF      |
|-------------------------------------|---------|----------------------------------------------|----------|
| Floods                              | 1095.91 | Investment - Agriculture                     | 1.98     |
| Droughts                            | 2.95    | Earthquakes                                  | 3.39     |
| Electric Power Coverage             | 71.08   | Investment - Environment                     | 7.16     |
| Natural Gas Coverage                | 6.52    | Investment - Prevention to disasters         | 7.67     |
| Illiteracy Rate (Census)            | 53.11   | Rural Illiteracy Rate (Census)               | 30.61    |
| Internet Coverage                   | 7.67    | Mass Movements                               | 185.89   |
| Aqueduct Coverage (Census)          | 28.73   | Companies Generating Formal Employment       | 3.42     |
| Urban Illiteracy Rate (Census)      | 15.62   | Mortality Rate                               | 10.46    |
| Sewerage Coverage                   | 15.64   | Indigenous Population                        | 8784.31  |
| Net coverage in basic education     | 12.61   | Black, mulatto or Afro-Colombian population  | 32383.15 |
| Cumulative total of disaster events | 4686.84 | Value added by economic activities - Primary | 1.35     |
| Qualitative housing deficit         | 17.51   | Raizal population                            | 4.86     |
| Quantitative housing deficit        | 4.67    | Rom population                               | 3.34     |
| Disaster Events 2017                | 1.59    | Disaster Events 2018                         | 1.42     |
| Forest Fires                        | 1172.86 | Rural Population                             | 4.59     |
| Incidence VIH-ODS                   | 1.39    | Total ethnic population                      | 45415.14 |
| Cocaine Cultivation Areas           | 1.33    | Over 85 years                                | 14.9     |
| Total income per capita             | 4.04    | Percentage of formally employed persons      | 1.19     |
| Coffee - Sown Area                  | 5.45    | Coffee - Harvested Area                      | 5.46     |
| Coffee - Production                 | 3.41    | Coffee - Yield                               | 2.90     |

Table S6. VIF table

| Feature                                 | VIF  | Feature                                      | VIF  |
|-----------------------------------------|------|----------------------------------------------|------|
| Natural Gas Coverage                    | 4.67 | Internet Coverage                            | 5.84 |
| Net coverage in basic education         | 9.17 | Quantitative housing deficit                 | 2.77 |
| Incidence VIH-ODS                       | 1.32 | Total income per capita                      | 3.61 |
| Investment - Agriculture                | 1.83 | Investment - Environment                     | 4.93 |
| Investment - Prevention to disasters    | 4.35 | Companies Generating Formal Employment       | 3.17 |
| Raizal population                       | 1.88 | Rom population                               | 1.84 |
| Percentage of formally employed persons | 1.17 | Droughts                                     | 1.30 |
| Earthquakes                             | 1.26 | Rural Illiteracy rate                        | 9.05 |
| Urban Illiteracy Rate                   | 8.08 | Value added by economic activities - Primary | 1.26 |
| Disasters Events 2017                   | 1.44 | Disasters Events 2018                        | 1.38 |
| Coca Cultivation Areas                  | 1.27 | Coffee - Sown Area                           | 5.40 |
| Coffee - Harvested Area                 | 5.40 | Coffee - Production                          | 3.39 |
| Coffee - Yield                          | 2.28 |                                              |      |

Table S7. VIF table - final set of covariates

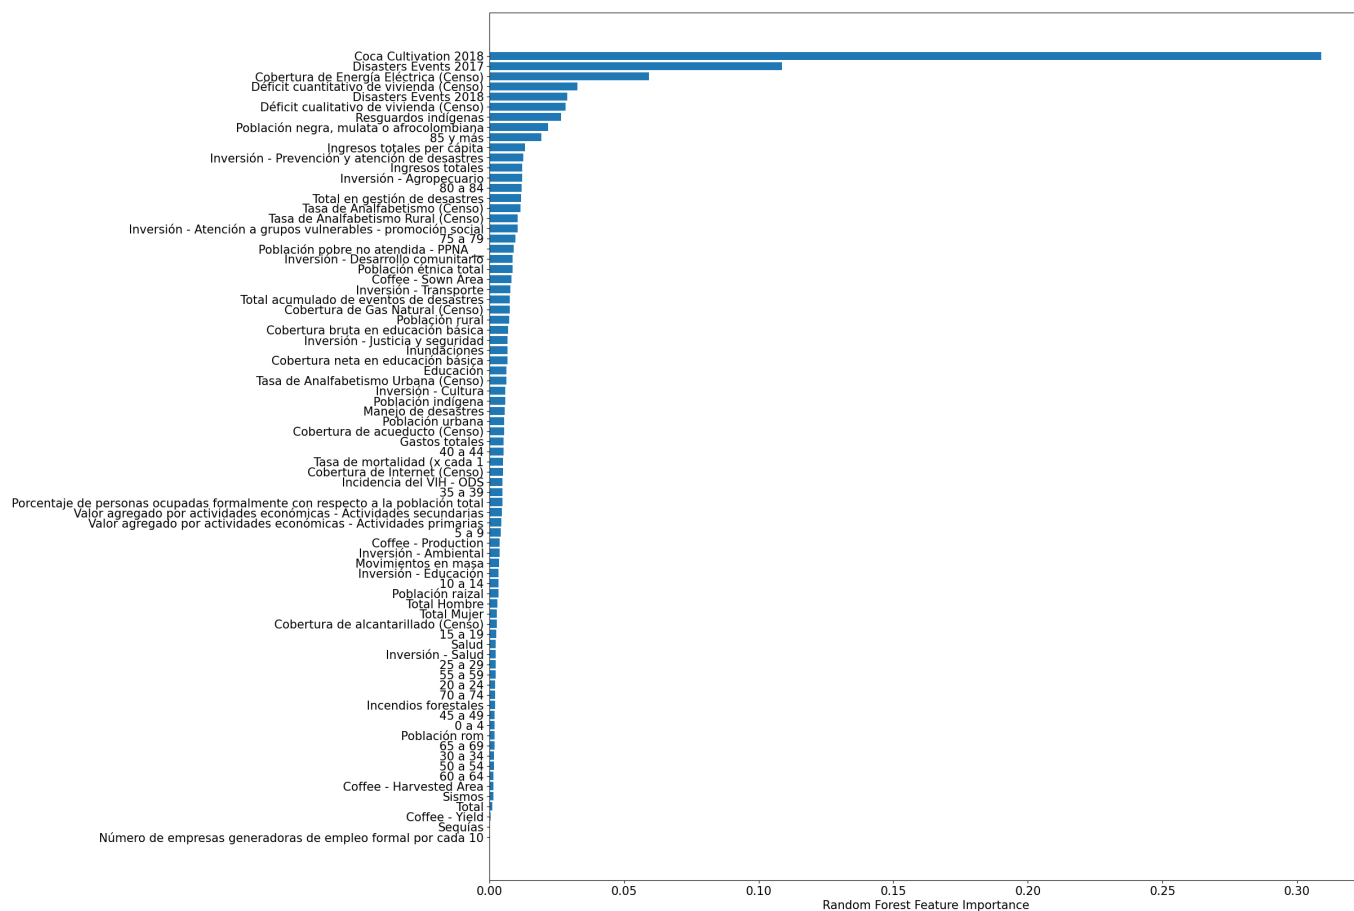

**Figure S5.** Random Forest based on Gini - Feature importance

## 4 SPATIAL EXPLORATION

We test the spatial autocorrelation of the conflicts-related process through the Moran's I statistics. The Moran scatterplot is an illustration of the relationship between the values of the attribute (conflicts) at each location and the average value of the same attribute at neighboring locations. Through the local analysis, we are able to distinguish which are areas with lower or higher spatial correlations. In particular, areas are divided in:

- High-High: high values surrounded by high values;
- Low-Low: low values surrounded by low values;
- High-Low: high values surrounded by low values;
- Low-High: low values surrounded by high values;
- ns: non significant.

Figure S6 and Figure S7 show respectively the Global and Local Moran's I scatterplot.

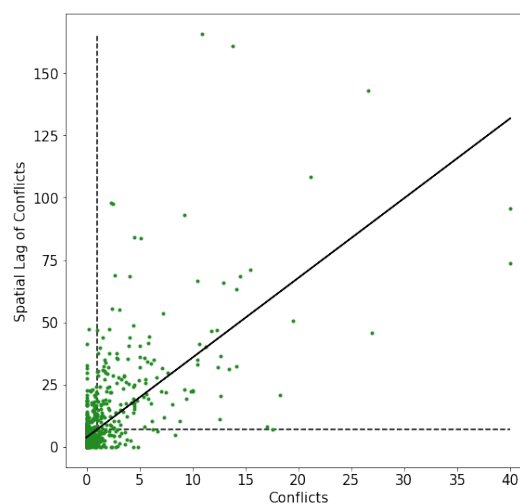

**Figure S6.** Global Moran Scatterplot

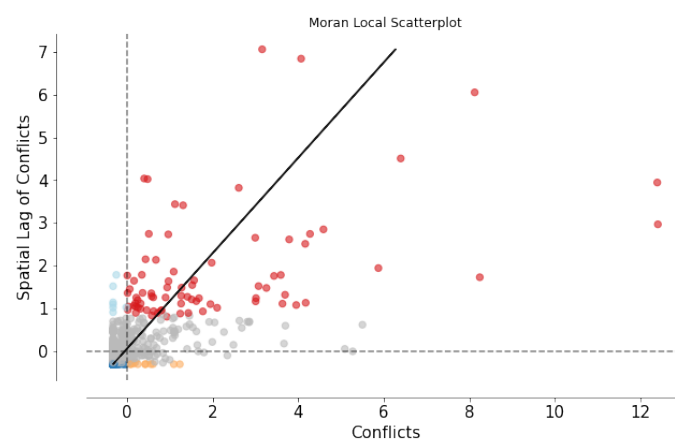

**Figure S7.** Local Moran Scatterplot

## 5 GLOBAL SPATIAL REGRESSION MODELS

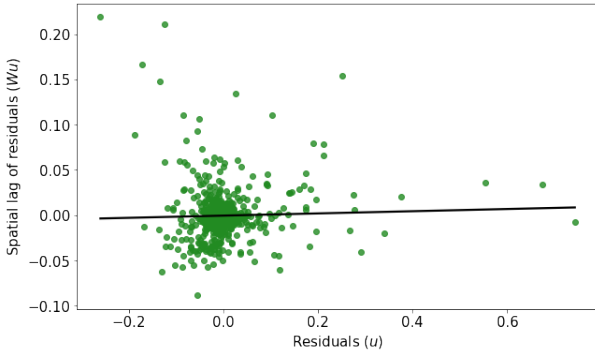

**Figure S8.** Residuals versus spatial lag of residuals - Spatial Lag Model

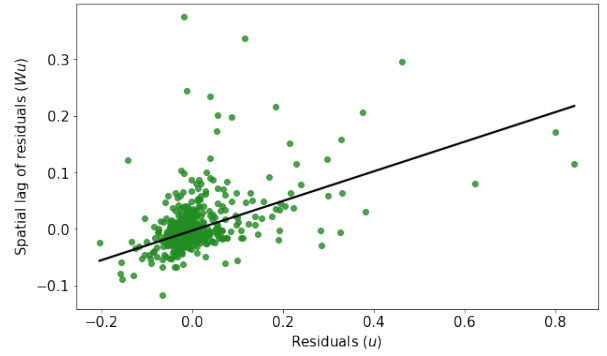

**Figure S9.** Residuals versus spatial lag of residuals - Spatial Error Model

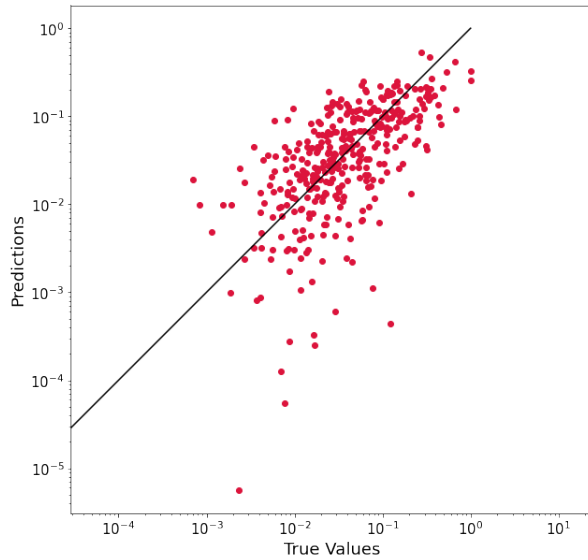

**Figure S10.** Actual versus predicted value - Spatial Lag Model

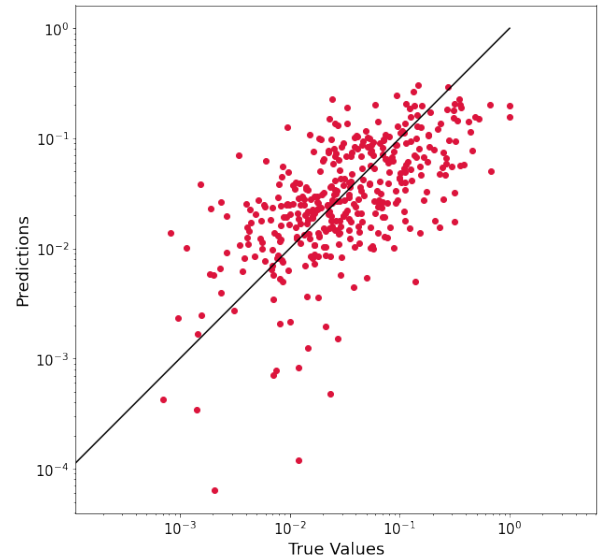

**Figure S11.** Actual versus predicted value - Spatial Error Model

We test the regression model by using the variables final set selected by using the two additional feature selection approaches.

With respect to the VIF method, we run both the Lagrange Multiplier test and the spatial models with the new subset of features reported in Table S7. The general results do not change because the spatial lag model turns out to be more suitable than the spatial error model, and the features that show significant p-values are always the same: cocaine cultivation areas, natural disasters in 2017, rural illiteracy rate. However, in this case, the electric power coverage is filter our from the subset of feature and the natural gas coverage shows a p-value higher than 0.05. By considering less features in the model, with our subset of features, the electric power coverage and the natural gas coverage shows a negative correlation with conflicts with p-values lower than 0.05. Table S8 shows the regression summary.

As regards the Random Forest based on Gini method, we run again the Lagrange Multiplier test and the spatial models and we obtain similar results. Also in this case, the set of features that show significant

p-values are: cocaine cultivation areas, natural disasters in 2017, rural illiteracy rate and electric power coverage. In this case, the natural gas coverage variable get filtered out in the feature selection process. Table S9 shows the regression summary.

### Summary of Output Spatial Lag Model

Pseudo R-squared = 0.49  
 Spatial Pseudo R-squared = 0.34  
 Sigma-square ML = 0.003  
 S.E of regression = 0.057  
 Log likelihood = 1568.41  
 Akaike info criterion = -3080.83  
 Schwarz criterion = -2940.71

| Variable                                | Coefficient | Std. Error | z-Statistic | Probability |
|-----------------------------------------|-------------|------------|-------------|-------------|
| CONSTANT                                | -0.019      | 0.008      | -2.378      | 0.017       |
| Natural Gas Coverage                    | -0.014      | 0.009      | -1.602      | 0.109       |
| Internet Coverage                       | 0.017       | 0.019      | 0.856       | 0.392       |
| Net Coverage in Basic Education         | 0.027       | 0.020      | 1.322       | 0.186       |
| Quantitative Housing Deficit            | 0.023       | 0.011      | 2.067       | 0.038       |
| Incidence VIH-ODS                       | 0.022       | 0.045      | 0.490       | 0.623       |
| Total income per capita                 | 0.005       | 0.026      | 0.202       | 0.839       |
| Investment - Agriculture                | 0.042       | 0.025      | 1.663       | 0.096       |
| Investment - Environment                | -0.002      | 0.086      | -0.026      | 0.979       |
| Investment - Prevention to disasters    | -0.001      | 0.063      | -0.014      | 0.989       |
| Companies Generating Formal Employment  | -0.030      | 0.047      | -0.658      | 0.511       |
| Raizal population                       | 0.008       | 0.074      | 0.109       | 0.913       |
| Rom population                          | 0.008       | 0.063      | 0.130       | 0.896       |
| Rural population                        | -0.017      | 0.026      | -0.673      | 0.501       |
| Percentage of formally employed persons | -0.015      | 0.048      | -0.318      | 0.750       |
| Droughts                                | -0.009      | 0.016      | -0.613      | 0.539       |
| Earthquakes                             | 0.010       | 0.015      | 0.687       | 0.492       |
| Rural Illiteracy Rate                   | 0.046       | 0.021      | 2.174       | 0.029       |
| Urban Illiteracy Rate                   | -0.010      | 0.018      | -0.567      | 0.571       |
| Value added by economic activities      | -0.047      | 0.042      | -1.120      | 0.263       |
| Disasters Events 2017                   | 0.15        | 0.026      | 5.729       | 0.000       |
| Disasters Events 2018                   | 0.021       | 0.017      | 1.229       | 0.219       |
| Coca Cultivation Areas                  | 0.198       | 0.018      | 10.897      | 0.000       |
| Coffee - Sown Areas                     | 0.022       | 0.016      | 1.386       | 0.166       |
| Coffee - Harvested Areas                | -0.007      | 0.016      | -0.406      | 0.685       |
| Coffee - Production                     | -0.006      | 0.013      | -0.479      | 0.632       |
| Coffee - Yield                          | 0.001       | 0.006      | 0.224       | 0.822       |
| W Violence Events 2018                  | 0.616       | 0.033      | 18.551      | 0.000       |

**Table S8.** Summary of output Spatial Lag Model - VIF method for feature selection

### Summary of Output Spatial Lag Model

Pseudo R-squared = 0.48  
 Spatial Pseudo R-squared = 0.34  
 Sigma-square ML = 0.003  
 S.E of regression = 0.057  
 Log likelihood = 1564.26  
 Akaike info criterion = -3094.52  
 Schwarz criterion = -3009.45

| Variable                             | Coefficient | Std. Error | z-Statistic | Probability |
|--------------------------------------|-------------|------------|-------------|-------------|
| CONSTANT                             | 0.032       | 0.017      | 1.898       | 0.058       |
| Qualitative Housing Deficit          | -0.001      | 0.009      | -0.103      | 0.918       |
| Total income per capita              | 0.009       | 0.023      | 0.378       | 0.706       |
| Total income                         | 0.051       | 0.474      | 0.107       | 0.914       |
| Investment - Agriculture             | 0.035       | 0.024      | 1.418       | 0.156       |
| Investment - Prevention to disasters | 0.009       | 0.108      | 0.091       | 0.927       |
| Rural Illiteracy Rate                | 0.037       | 0.017      | 2.157       | 0.031       |
| Disasters Events 2017                | 0.141       | 0.026      | 5.501       | 0.000       |
| Disasters Events 2018                | 0.024       | 0.017      | 1.398       | 0.162       |
| Coca Cultivation Areas               | 0.199       | 0.018      | 11.138      | 0.000       |
| Electric Power Coverage              | -0.045      | 0.017      | -2.706      | 0.007       |
| Indigenous Reservation               | -0.062      | 0.045      | -1.358      | 0.174       |
| 80 - 84 years old                    | -0.318      | 1.405      | -0.226      | 0.821       |
| Over 85 years old                    | 0.183       | 1.446      | 0.127       | 0.899       |
| Total disaster management            | 0.072       | 0.322      | 0.223       | 0.824       |
| W Violence Events 2018               | 0.618       | 0.033      | 18.833      | 0.000       |

**Table S9.** Summary of output Spatial Lag Model - Random Forest based on Gini method for feature selection

## 6 EXPLORING PAST CONFLICTS

We have available data about the number of conflicts per municipality from 2008 to 2018. Since our main goal is to run a spatial model considering observations of all the Colombian municipalities, we explore the correlation between the number of conflicts in 2018 and all the previous years. Figure S12 reports the heatmap with all the correlation coefficients. To avoid multicollinearity problems and redundancy, we filter out all the features that show a coefficient among each other higher than 0.8. Finally, we select the feature that present the strong correlation with the outcome variable: in Figure S13 we can see that the variable related to conflicts in 2017 has the highest coefficient. In Table S10 we report the regression coefficients of the spatial regression model, while Figure S14 and Figure S15 show, respectively, the residuals versus the spatial lag of residuals plot and the actual versus predicted values plot.

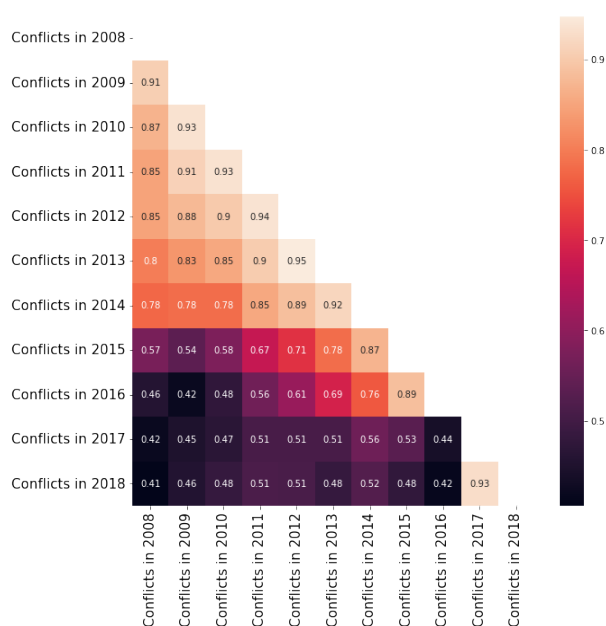

**Figure S12.** Correlation coefficient heatmap

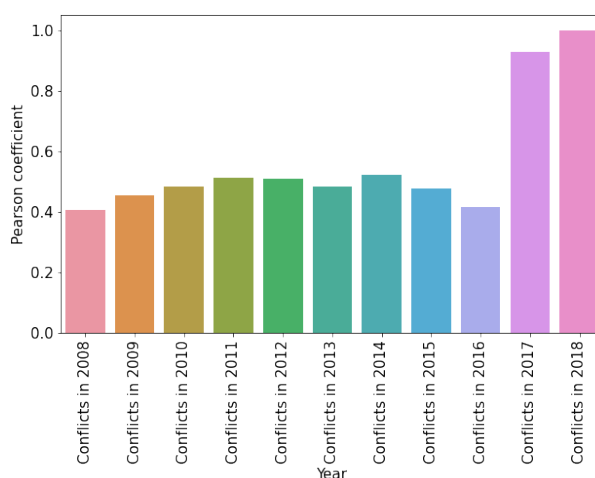

**Figure S13.** Barplot showing the correlation between each independent variable and the outcome variable

### Summary of Output Spatial Lag Model

Pseudo R-squared = 0.61  
 Spatial Pseudo R-squared = 0.55  
 Sigma-square ML = 0.002  
 S.E of regression = 0.050  
 Log likelihood = 1728.83  
 Akaike info criterion = -3431.65  
 Schwarz criterion = -3366.60

| Variable                        | Coefficient | Std. Error | z-Statistic | Probability |
|---------------------------------|-------------|------------|-------------|-------------|
| CONSTANT                        | -0.070      | 0.016      | -4.432      | 0.000       |
| Coca Cultivation Areas          | 0.125       | 0.016      | 7.626       | 0.000       |
| Disasters Events 2017           | 0.087       | 0.022      | 3.922       | 0.000       |
| Electric Power Coverage         | 0.056       | 0.016      | 3.701       | 0.000       |
| Indigenous Population           | 0.021       | 0.035      | 0.583       | 0.560       |
| Investment - Agriculture        | 0.019       | 0.020      | 0.948       | 0.343       |
| Mortality Rate                  | -0.020      | 0.016      | -1.186      | 0.236       |
| Natural Gas Coverage            | -0.006      | 0.007      | -0.834      | 0.404       |
| Net Coverage in Basic Education | 0.041       | 0.016      | 2.490       | 0.013       |
| Rural Illiteracy Rate           | 0.027       | 0.015      | 1.764       | 0.078       |
| Sewer Coverage                  | -0.002      | 0.009      | -0.223      | 0.823       |
| Violence Events 2017            | 0.630       | 0.032      | 19.384      | 0.000       |
| W Violence Events 2018          | 0.061       | 0.004      | 13.955      | 0.000       |

**Table S10.** Summary of output Spatial Lag Model

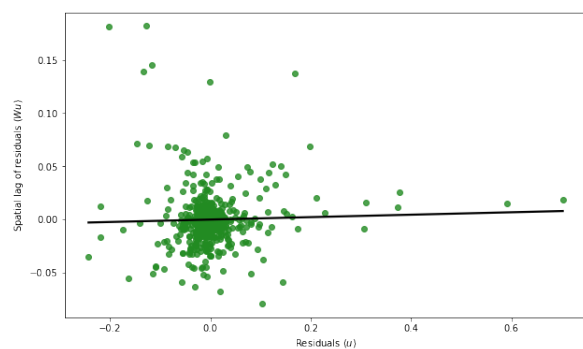

**Figure S14.** Adding past conflicts information: Residuals versus spatial lag of residuals - Spatial Lag Model

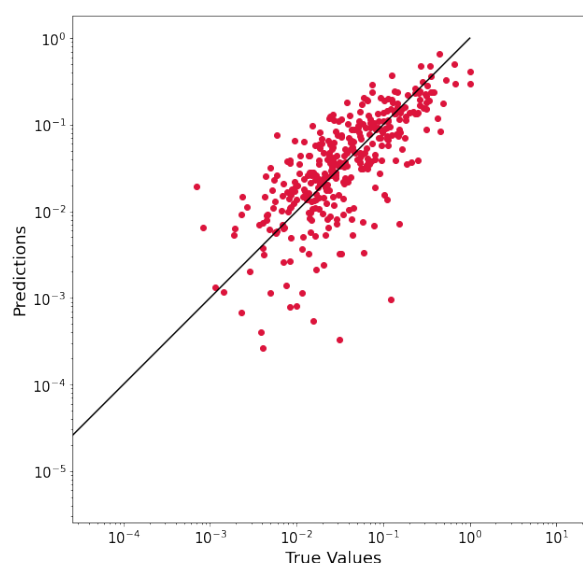

**Figure S15.** Adding past conflicts information: Actual versus predicted values - Spatial Lag Model



## 7 ANALYSIS ON A RESTRICTED AREA

|           | Spatial lag ( $H_0 : \rho = 0$ ) | Spatial error ( $H_0 : \lambda = 0$ ) |
|-----------|----------------------------------|---------------------------------------|
| LM        | 5.47 (0.019)                     | 0.18 (0.669)                          |
| Robust LM | 7.40 (0.007)                     | 2.12 (0.145)                          |

**Table S11.** Norte de Santander department: Lagrange Multiplier Tests. (The numbers in parentheses are p-values).

### Summary of Output Spatial Lag Model

Pseudo R-squared = 0.78  
 Spatial Pseudo R-squared = 0.78  
 Sigma-square ML = 0.013  
 S.E of regression = 0.116  
 Log likelihood = 28.68  
 Akaike info criterion = -43.35  
 Schwarz criterion = -31.53

| Variable                        | Coefficient | Std. Error | z-Statistic | Probability |
|---------------------------------|-------------|------------|-------------|-------------|
| CONSTANT                        | -0.009      | 0.038      | -0.243      | 0.808       |
| Coca Cultivation Areas          | 0.157       | 0.116      | 1.348       | 0.178       |
| Disasters Events 2017           | 0.541       | 0.100      | 5.391       | 0.000       |
| Indigenous reservation          | 0.161       | 0.098      | 1.648       | 0.099       |
| Net Coverage in Basic Education | -0.208      | 0.098      | -2.120      | 0.034       |
| Droughts                        | 0.097       | 0.048      | 2.010       | 0.044       |
| W Violence Events 2018          | 0.546       | 0.154      | 3.541       | 0.000       |

**Table S12.** Norte de Santander department: Summary of output Spatial Lag Model

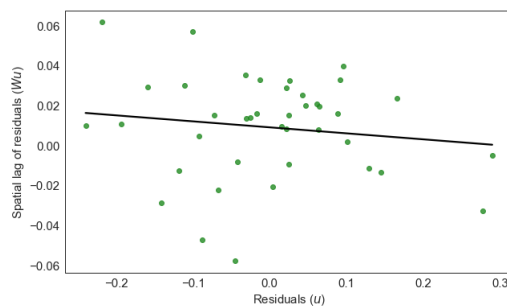

**Figure S16.** Norte de Santander department: Residuals versus spatial lag of residuals - Spatial Lag Model

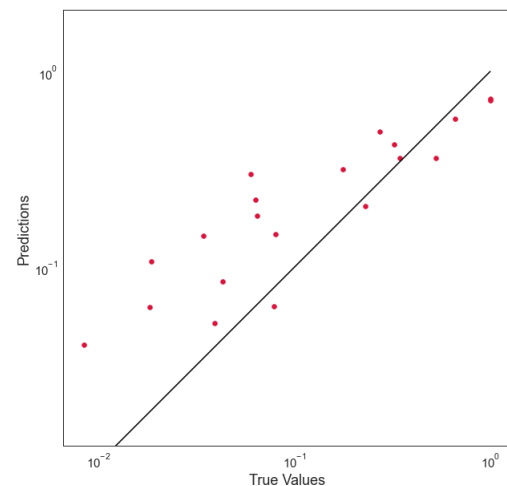

**Figure S17.** Norte de Santander department: Actual versus predicted values - Spatial Lag Model
